# Supplementary material
Source: Springer Nature journal article supplement (https://www.springermedizin.de/resource/supplementary/12943_2009_586_MOESM6_ESM.pdf/9555044)

**A****Pos -668 to -600****NF- $\kappa$ B binding site**

Homo gggcagaaggactttatgctgcg-tggctggcatttccagtattttgataaaagtacttctctaaactt  
 Bos Tauru aggcagaagacctctgtgcggt-tcactggcatttccaggattttgataaatgttacttctgtaaactc  
 Cani gggcagaaggactctctgctgct-tagttggcatttccagtattttgataaaagtacttctctgaactc  
 Equu gggc---aggacttttctgctgct-tagctggcatttccagtattttgataaaacttacttctctaaactc  
 Troglodyt gggcagaaggactttatgctgcg-tggctggcatttccagtattttgataaaagtacttctctaaactt  
 Pongo gggcagaaggactttatgctgcg-tggctggcatttccagtattttgataaaagtacttctctaaactt  
 Macaca gggcagaaggactttatgctgcg-tggctggcatttccagtattttgataaaagtacttctctaaactt  
 Mus actcagaagggtttatgcagcttaagctggcagccccagtattttgataaaagtactagtgtaaaatt  
 Rattus attcagaaggactttatgcaact-cggetggcogtcccagtatggttgataaaagtactagtgtaaaatt

**Pos -347 to -280****NF- $\kappa$ B binding site**

Homo ttaaaagcttaaagctgg--tggaaagcccttgcacagccctgttttcatttttatcggatgaaatgcat  
 Bos Taurus ttaaaagcttaaagctgg--tagaa-accttttctggctctgt-ttcctttttatcggataaaatgcat  
 Canis ttaaaagcttaaagctgg--tggaa-acctttgtacagctctgt-ttcatttttatcggatcaaatacat  
 Equus ttaaaacttaaagctgg--tggaa-accttttatggctctgt-ttcatttttatcggataaaatacat  
 Troglodytes ttaaaagcttaaagctgg--tggaaagcccttgcacagccctgttttcatttttatcggatgaaatgcat  
 Pongo ttaaaagcttaaagctgg--tggaaagcccttgcacagccctgttttcatttttatcggatgaaatgcat  
 Macaca ttaaaagcttaaagctgg--tggaaagcccttgcacagccctgttttcatttttatcggatgaaatgcat  
 Mus -----cgcttcgagctga--tgggaaatt-ctgggcagctctga-ttcatttttatcggataaaagtacat  
 Rattus -----cgcttcgagttga--tgggaaagt-ctgggcagctctga-ttcatttttatcggataaaatacat

**B**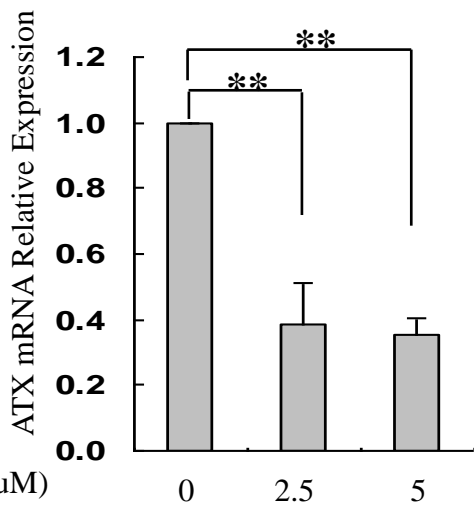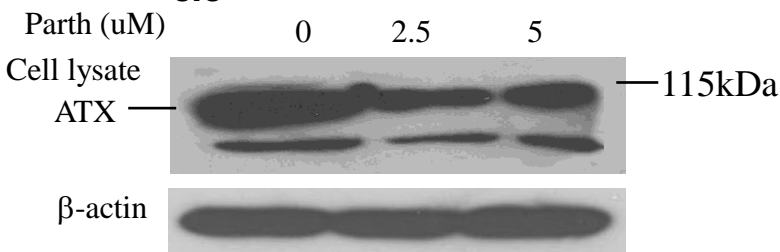**C**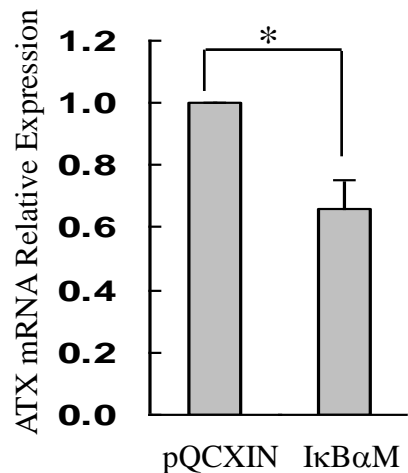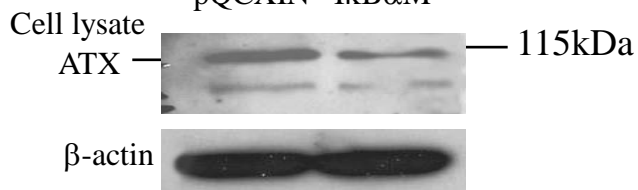

Supplement: MOESM6 [file 9555044]
